# Supplementary material
Source: PubMed Central journal article supplement (PMC5954190)
Supplement: MCB.00631-17_zmb999101761s1.pdf [file MCB.00631-17_zmb999101761s1.pdf]

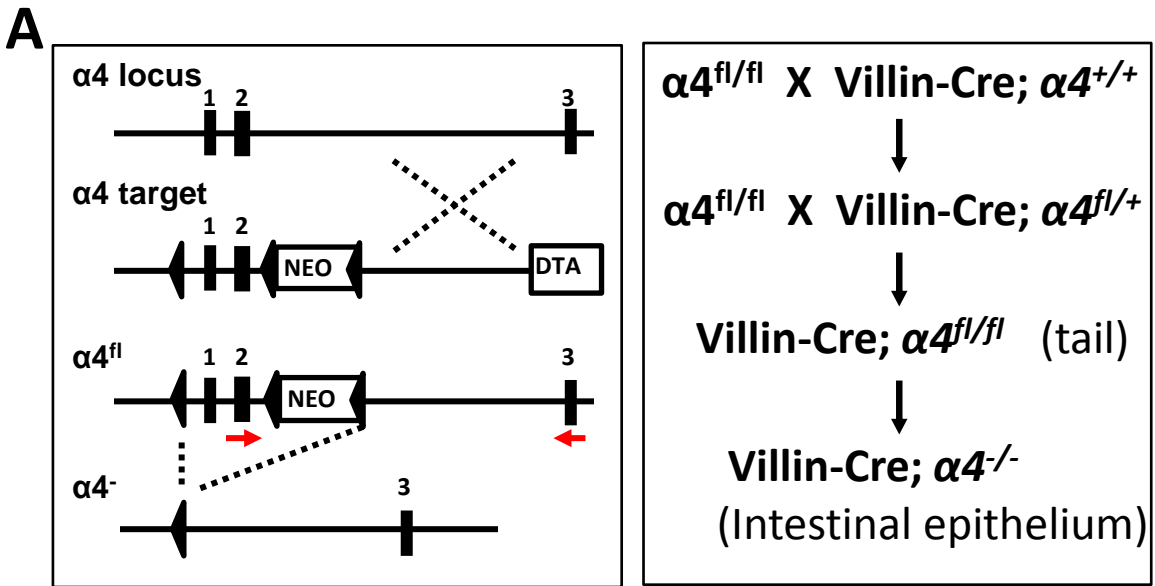

**B**

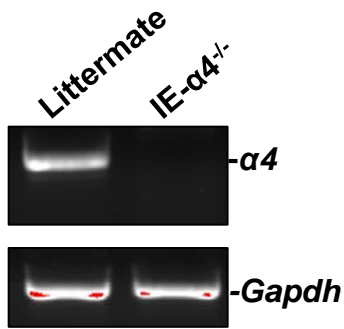

**C**

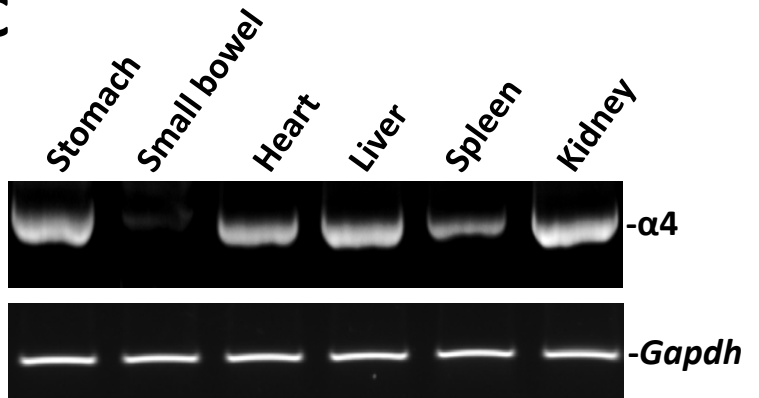

**Supplementary Figure 1:** Strategy for generation of IE- $\alpha 4^{-/-}$  mice and expression of  $\alpha 4$  in other organs. **(a)** Schematic of the complete exon-intron orientation of the  $\alpha 4$  locus and magnification of the NEO-containing exon. **(b)** Levels of  $\alpha 4$  mRNA in the small intestinal mucosa obtained from littermate and IE- $\alpha 4^{-/-}$  mice as measured by RT-PCR analysis. **(c)** Levels of  $\alpha 4$  mRNA in stomach mucosa, small intestinal mucosa, heart, liver, spleen, and kidney in IE- $\alpha 4^{-/-}$  mice.

**A**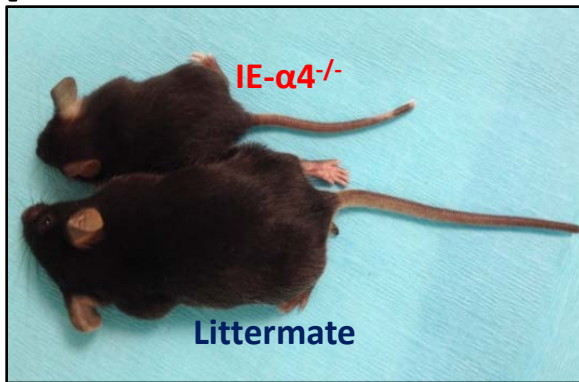**B**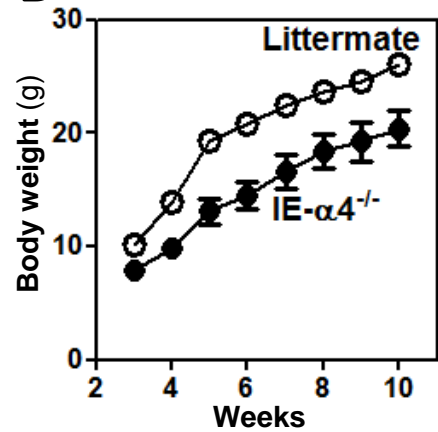**C**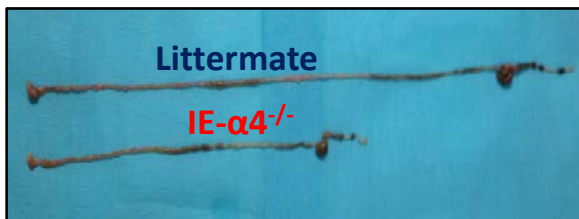

**Supplementary Figure 2:** Global abnormalities caused by intestinal epithelium-specific  $\alpha$ 4 deletion in mice. **(a)** Male littermate and IE- $\alpha$ 4<sup>-/-</sup> mice at 1 month of age. **(b)** Body weights of age- and sex-matched littermates and IE- $\alpha$ 4<sup>-/-</sup> mice. Values are the means  $\pm$  SEM ( $n = 4$ ). \*  $P < 0.05$  compared with littermates. **(c)** Comparison of gastrointestinal gross morphology in littermates and IE- $\alpha$ 4<sup>-/-</sup> mice.

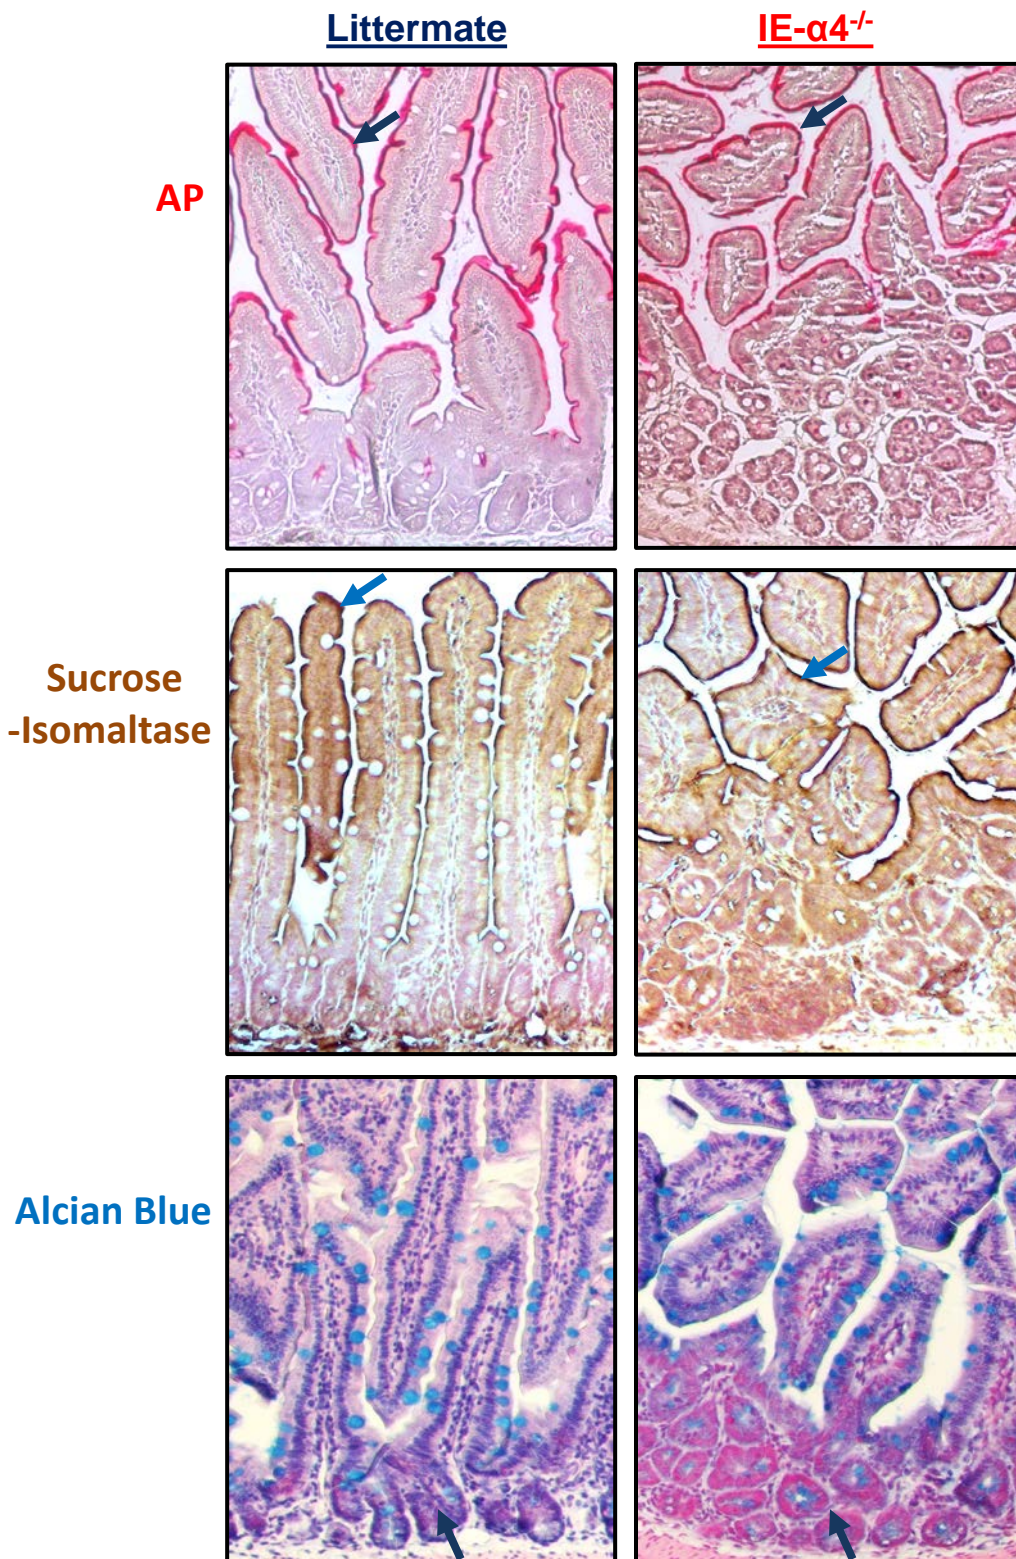

**Supplementary Figure 3:** Immunochemical staining of brush border membrane proteins and goblet cells in the small intestinal mucosa. Alkaline phosphatase (AP) and sucrose-isomaltase are shown as red and brown, respectively (arrow). Goblet cells were examined by alcian blue (blue, arrow). Sections were counterstained with nuclear fast red.



## A a. Littermate

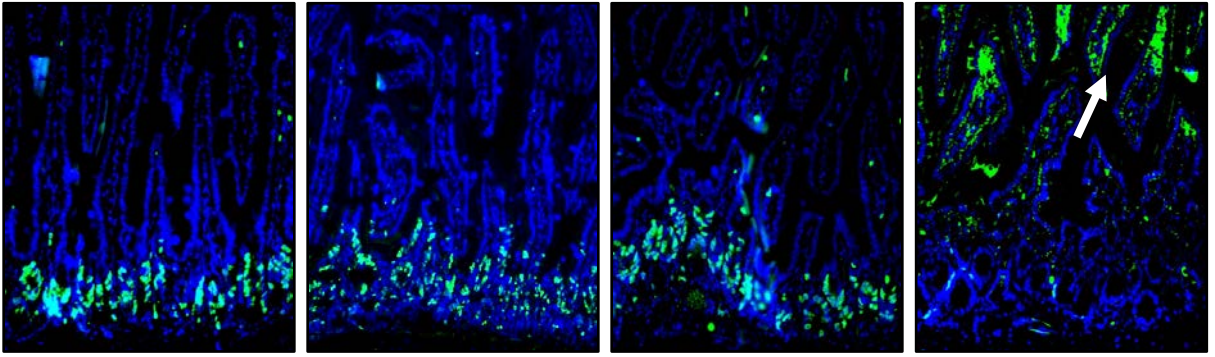

## b. IE- $\alpha 4^{-/-}$

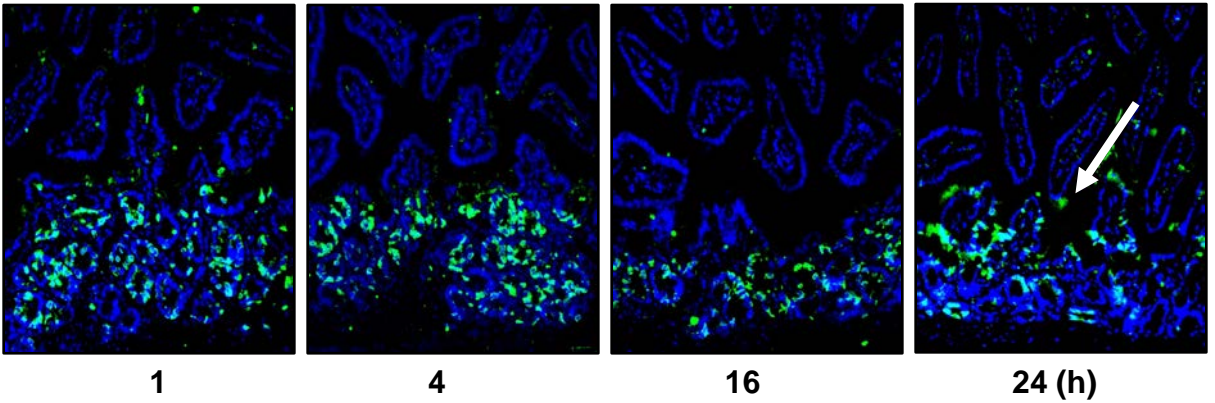

## B a. Littermate

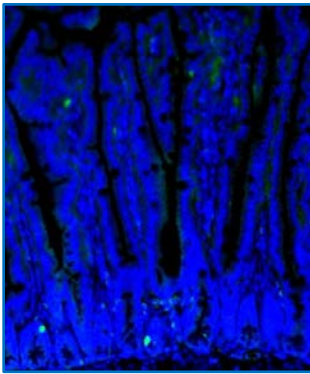

## b. IE- $\alpha 4^{-/-}$

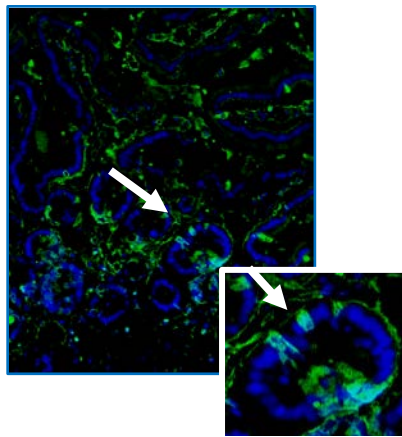

## C

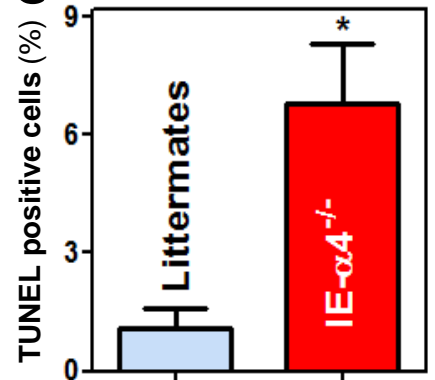

**Supplementary Figure 4:**  $\alpha 4$  deletion inhibits cell migration and induces epithelial cell death in the small intestine. **(a)** Changes in the rate of epithelial cell migration in the small intestinal mucosa of littermate **(a)** and IE- $\alpha 4^{-/-}$  **(b)** mice. Mice were injected with BrdU, and the mucosal tissues were harvested at the times indicated. **(b)** Epithelial cell death as examined by TUNEL staining (shown as green) in the small intestine of littermate **(a)** and IE- $\alpha 4^{-/-}$  **(b)** mice. **(c)** Summary of TUNEL-positive cells in mucosa prepared as described in **(b)** ( $n = 6$ ). \*  $P < 0.05$  compared with littermates.

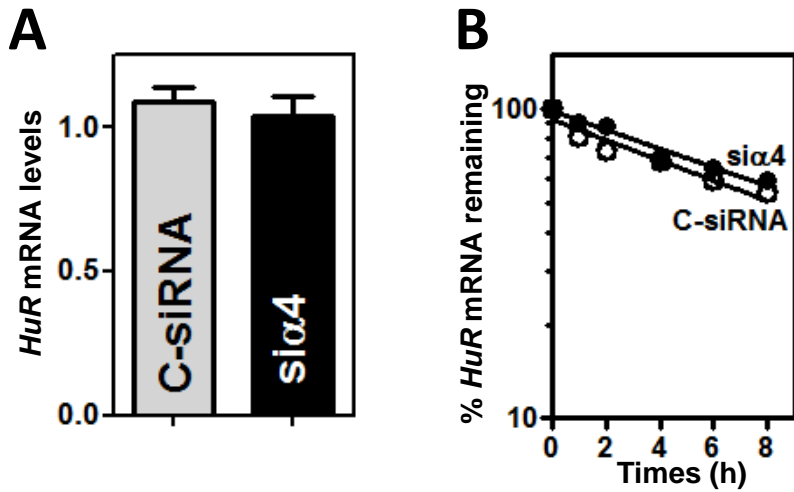

**Supplementary Figure 5:**  $\alpha$ 4 silencing fails to alter levels and stability of the *HuR* mRNA. **(a)** Steady-state levels of *HuR* mRNA 48 h after transfection with si $\alpha$ 4 or C-siRNA. **(b)** Half-life of the *HuR* mRNA in cells described in (a). The levels of *HuR* mRNA were examined at different times after administration of actinomycin D. Values are the means  $\pm$  SEM of data from triplicate experiments.

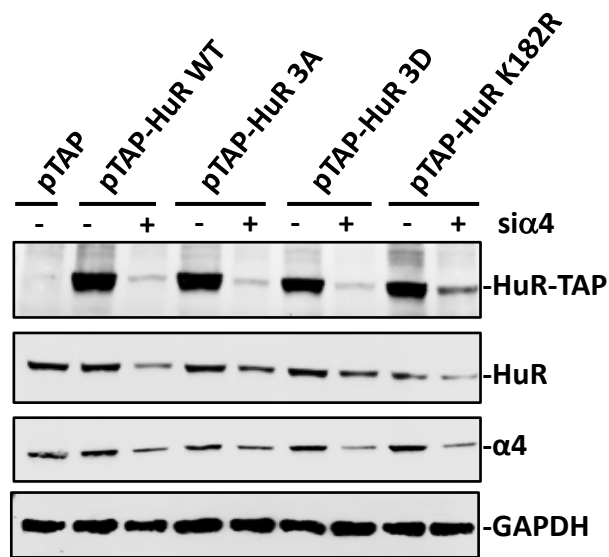

**Supplementary Figure 6.** The relative stability of each of HuR-TAP mutants after  $\alpha 4$  silencing in cultured IECs. Cells were co-transfected with si $\alpha 4$  and pTAP-HuR WT (wild-type HuR-TAP), pTAP-HuR3A (carrying three non-phosphorylatable mutations, S88A, S100A, T118A), pTAP-HuR3D (carrying three non-phosphorylatable mutations, S88D, S100D, T118D), or pTAP-HuR K182R. The levels of HuR-TAP were examined 48 h after the transfection by Western blotting analysis.
